# Supplementary material for: Alcohol intake and prognosis of atrial fibrillation
Source: HighWire-hosted journal article supplement (doi:10.1136/heartjnl-2013-304036), 2013-06-13
Supplement: heartjnl-2013-304036supp_tables.pdf [file heartjnl-2013-304036supp_tables.pdf]

**Web-only table 1.** ICD-codes and ATC drug codes used in the study.

| <b>Diagnosis</b>                                    | <b>ICD-8 codes</b> | <b>ICD-10 codes</b>                                                                                          | <b>Drug code</b>                                                                                                                                                                           |
|-----------------------------------------------------|--------------------|--------------------------------------------------------------------------------------------------------------|--------------------------------------------------------------------------------------------------------------------------------------------------------------------------------------------|
| Heart failure                                       | 425, 4270, 4271    | I110, I42, I50, J819                                                                                         | C03C                                                                                                                                                                                       |
| Hypertension                                        | N/A                | N/A                                                                                                          | C02A, C02B, C02C, C02DA,<br>C02L, C03A, C03B, C03D,<br>C03E, C03X, C07C, C07D,<br>C08G, C09BA, C09DA, C09X,<br>A52, C02DB, C02DD, C02DG,<br>C04, C05, C07, C07F, C08,<br>C09BB, C09DB, C09 |
| Thromboembolism<br>and transient<br>ischemic attack | 433-438, 444, 450  | G458, G459, I26,<br>I63, I64, I74                                                                            | N/A                                                                                                                                                                                        |
| Vascular disease                                    | 410, 440           | I21, I22, I700,<br>I702-I709                                                                                 | N/A                                                                                                                                                                                        |
| Diabetes                                            | 249, 250           | E10, E11, E14                                                                                                | A10                                                                                                                                                                                        |
| Intracranial<br>bleeding                            | N/A                | I60-62                                                                                                       | N/A                                                                                                                                                                                        |
| Gastrointestinal<br>bleeding                        | N/A                | I850, K250, K252,<br>K254, K256, K260,<br>K262, K264, K266,<br>K270, K272, K274,<br>K276 K280, K920,<br>K921 | N/A                                                                                                                                                                                        |
| Haematuria                                          | N/A                | N02, R31                                                                                                     | N/A                                                                                                                                                                                        |

**N/A:** not applicable, i.e. not used for this study.

**Web-only table 2.** Incidence rates per 100 person years for men (top) and women (bottom) with incident atrial fibrillation according to weekly alcohol intake.

| Men ( <i>n</i> =1,999)   | Alcohol intake, drinks* per week |           |           |           |           |
|--------------------------|----------------------------------|-----------|-----------|-----------|-----------|
|                          | Abstainers                       | <14       | 14 to 20  | 21 to 27  | >27       |
| Thromboembolism†         | 9.5                              | 5.3       | 4.9       | 5.5       | 7.3       |
| or death                 | (5.9-15.2)                       | (4.7-6.0) | (3.8-6.4) | (4.2-7.1) | (6.2-8.6) |
| Thromboembolism          | 2.2                              | 1.6       | 1.1       | 1.7       | 1.7       |
|                          | (0.8-5.9)                        | (1.3-2.1) | (0.6-1.9) | (1.1-2.7) | (1.2-2.3) |
| Death                    | 6.8                              | 3.9       | 4.1       | 4.1       | 6.1       |
|                          | (3.9-11.7)                       | (3.4-4.5) | (3.1-5.5) | (3.1-5.5) | (5.2-7.3) |
| Women ( <i>n</i> =1,108) | Abstainers                       | <7        | 7 to 13   | 14 to 20  | >20       |
| Thromboembolism          | 6.8                              | 3.9       | 4.1       | 4.1       | 6.1       |
| or death                 | (3.9-11.7)                       | (3.4-4.5) | (3.1-5.5) | (3.1-5.5) | (5.2-7.3) |
| Thromboembolism          | 1.0                              | 1.3       | 1.4       | 1.0       | 2.0       |
|                          | (0.3-4.1)                        | (0.9-1.8) | (0.8-2.3) | (0.4-2.4) | (1.0-3.8) |
| Death                    | 3.6                              | 3.4       | 3.2       | 4.0       | 3.3       |
|                          | (1.7-7.5)                        | (2.8-4.2) | (2.3-4.5) | (2.6-6.2) | (2.0-5.3) |

\* 1 drink corresponds to 12 grams of ethanol; † comprising ischemic stroke or arterial thromboembolism.

**Web-only table 3.** Hazard ratios (95% confidence interval) for thromboembolism and death according to weekly alcohol intake for the entire cohort.

|                                      | Alcohol intake, drinks* per week |                       |                      |                       |                                   |
|--------------------------------------|----------------------------------|-----------------------|----------------------|-----------------------|-----------------------------------|
|                                      | Abstainers                       | < 7/14<br>(reference) | 14 to 20/<br>7 to 13 | 21 to 27/<br>14 to 20 | > 27/20                           |
| Subjects, <i>n</i>                   | 88                               | 1,626                 | 470                  | 344                   | 579                               |
| <b>Thromboembolism or death</b>      |                                  |                       |                      |                       |                                   |
| - VKA adjusted <sup>†</sup>          | 1.36<br>(0.91-2.02)              | 1                     | 0.93<br>(0.75-1.17)  | 1.07<br>(0.84-1.35)   | <b>1.30</b><br><b>(1.08-1.56)</b> |
| - Multi adjusted <sup>‡</sup>        | 1.16<br>(0.78-1.73)              | 1                     | 1.00<br>(0.81-1.26)  | 1.14<br>(0.90-1.45)   | <b>1.31</b><br><b>(1.09-1.58)</b> |
| - Frequency<br>adjusted <sup>§</sup> | 0.99<br>(0.65-1.50)              | 1                     | 1.07<br>(0.83-1.38)  | 1.19<br>(0.91-1.57)   | <b>1.35</b><br><b>(1.07-1.72)</b> |
| <b>Thromboembolism</b>               |                                  |                       |                      |                       |                                   |
| - VKA adjusted                       | 1.05<br>(0.46-2.39)              | 1                     | 0.81<br>(0.53-1.24)  | 0.96<br>(0.61-1.50)   | 1.08<br>(0.76-1.55)               |
| - Multi adjusted                     | 0.96<br>(0.42-2.19)              | 1                     | 0.84<br>(0.55-1.30)  | 0.98<br>(0.63-1.54)   | 1.12<br>(0.78-1.61)               |
| - Frequency<br>adjusted              | 0.87<br>(0.37-2.06)              | 1                     | 0.93<br>(0.57-1.51)  | 1.09<br>(0.65-1.83)   | 1.25<br>(0.79-1.98)               |
| <b>Death</b>                         |                                  |                       |                      |                       |                                   |
| - VKA adjusted                       | 1.32<br>(0.84-2.07)              | 1                     | 0.99<br>(0.77-1.27)  | 1.09<br>(0.84-1.43)   | <b>1.41</b><br><b>(1.15-1.72)</b> |
| - Multi adjusted                     | 1.11<br>(0.70-1.75)              | 1                     | 1.08<br>(0.85-1.39)  | 1.15<br>(0.88-1.50)   | <b>1.43</b><br><b>(1.17-1.75)</b> |
| - Frequency<br>adjusted              | 0.93<br>(0.58-1.50)              | 1                     | 1.14<br>(0.86-1.51)  | 1.18<br>(0.87-1.60)   | <b>1.44</b><br><b>(1.12-1.87)</b> |

**Thromboembolism:** includes ischemic stroke or peripheral arterial thromboembolism. Measures of association in **bold** indicates statistical significance.

\* One drink equates to 12 grams of pure alcohol; † Calculated using Cox's regression with time since atrial fibrillation diagnosis as underlying time variable and adjusted for VKA treatment; ‡ Further adjustment for CHA<sub>2</sub>DS<sub>2</sub>-VASc components; § Also adjusted for frequency of intake (not weekly, non-daily or daily).

**Web-only table 4.** Incidence rates and hazard ratios for thromboembolism or death among men with CHA<sub>2</sub>DS<sub>2</sub>-VASc=0 and women with CHA<sub>2</sub>DS<sub>2</sub>-VASc=1 according to alcohol intake

| Men                                          | Abstainers                         | Alcohol intake, drinks* per week |                     |                     |                                   |
|----------------------------------------------|------------------------------------|----------------------------------|---------------------|---------------------|-----------------------------------|
|                                              |                                    | <14<br>(reference)               | 14 to 20            | 21 to 27            | >27                               |
| Subjects, <i>n</i>                           | 9                                  | 254                              | 56                  | 61                  | 118                               |
| Incidence rates <sup>†</sup>                 | 5.5 (1.8-17.2)                     | 2.3 (1.7-3.1)                    | 1.6 (0.7-3.6)       | 3.6 (2.1-5.9)       | 4.0 (2.8-5.7)                     |
| Multi adjusted <sup>‡</sup><br>hazard ratios | <b>4.14</b><br><b>(1.26-13.65)</b> | 1                                | 0.72<br>(0.31-1.71) | 1.54<br>(0.85-2.80) | <b>1.88</b><br><b>(1.18-2.99)</b> |

  

| Women                                        | Abstainers | Alcohol intake, drinks* per week |                     |                     |                     |
|----------------------------------------------|------------|----------------------------------|---------------------|---------------------|---------------------|
|                                              |            | <7<br>(reference)                | 7 to 13             | 14 to 20            | >20                 |
| Subjects, <i>n</i>                           | 8          | 127                              | 52                  | 23                  | 26                  |
| Incidence rates <sup>†</sup>                 | N/A        | 1.6 (1.0-2.6)                    | 2.5 (1.3-4.8)       | 3.3 (1.4-8.0)       | 1.8 (0.6-5.6)       |
| Multi adjusted <sup>‡</sup><br>hazard ratios | N/A        | 1                                | 1.47<br>(0.64-3.37) | 2.34<br>(0.85-1.34) | 1.07<br>(0.31-3.70) |

**Thromboembolism** includes ischemic stroke or peripheral arterial thromboembolism. Measures of association in **bold** indicates statistical significance.

\* One drink equates to 12 grams of pure alcohol; † Incidence rates per 100 person years; ‡

Calculated using Cox's regression with time since atrial fibrillation diagnosis as underlying time variable and adjusted for VKA treatment and age.

N/A: not applicable, as no events were observed in this subgroup.
